# Supplementary material for: Alterations in Gene Expression during Incompatible Interaction between Amendoim Cavalo Common Bean and Colletotrichum lindemuthianum
Source: MDPI journal article supplement (doi:10.3390/plants13091245), 2024-04-30
Supplement: s1 [file s1]

**Table S1** Gene model and predicted functional annotation based on Phytozome.

| Gene model              | Gene                         | Predicted functional annotation on Phytozome                                                               |
|-------------------------|------------------------------|------------------------------------------------------------------------------------------------------------|
| <i>KTR2/3</i>           | <i>Co-x</i>                  | Serine/Threonine-protein kinase-like protein CCR3- related                                                 |
| <i>Phvul.001G243800</i> | <i>Co-1</i>                  | Serine/Threonine-Protein Kinase-Like Protein CCR3-Related                                                  |
| <i>Phvul.001G244300</i> | <i>Co-AC</i>                 | Clathrin Heavy Chain (CLTC)                                                                                |
| <i>Phvul.001G244400</i> | <i>Co-AC</i>                 | Uncharacterized protein                                                                                    |
| <i>Phvul.001G244500</i> | <i>Co-AC</i>                 | Basic Helix-Loop-Helix (bHLH) domain-containing protein with possible regulation of transcription function |
| <i>Phvul.001G245300</i> | <i>CoPv01<sup>CDRK</sup></i> | Protein Tyrosine Kinase (Pkinase_Tyr) // Leucine Rich Repeat N-terminal domain (LRRNT_2)                   |
| <i>Phvul.001G246300</i> | <i>CoPv01<sup>CDRK</sup></i> | Absciscic Acid Receptor PYL5                                                                               |
| <i>Phvul.003G109100</i> | <i>PR1a</i>                  | Pathogenesis-related protein 1 (PR1)                                                                       |
| <i>Phvul.006G196900</i> | <i>PR1b</i>                  | Pathogenesis-related protein Bet v I family (Bet_v_1))                                                     |
| <i>Phvul.009G256400</i> | <i>PR2</i>                   | Glucan endo-1,3-beta-D-glucosidase / Laminarinase                                                          |

**Table S2** Target genes, primers used, qPCR product size (amplicon), primer melting temperature (T<sub>m</sub>), amplification efficiency (E) and coefficient of determination of linear regression (R<sup>2</sup>).

| Gene Model <sup>a</sup>  | Genes                        | Primers Forward (F) and<br>Reverse (R) (5'-3')           | T <sub>m</sub><br>(°C) | Amplicon<br>(bp) | E <sup>b</sup> | R <sup>2c</sup> |
|--------------------------|------------------------------|----------------------------------------------------------|------------------------|------------------|----------------|-----------------|
| <i>Phvul.001G133200*</i> | <i>IDE</i>                   | F: AAGCAGGTATCTTGGCCATCTC<br>R: AAAGCAAACCTCCAAGCTCCAATC | F: 60.16<br>R: 59.99   | 126              | 0.92           | 0.99            |
| <i>Phvul.008G011000*</i> | <i>ACT</i>                   | F: ACAGCCAGGACCAGTTCATC<br>R: TGTATGTGGTCTCGTGAATGC      | F: 59.67<br>R: 58.38   | 154              | 0.93           | 0.98            |
| <i>Phvul.001G243800</i>  | <i>Co-1</i>                  | F: CCTCAAGGTGGGGCTTTTGAG<br>R: TCACCGAGAACTCCCATTGC      | F: 61.16<br>R: 60.61   | 118              | 1.01           | 0.99            |
| <i>KTR2/3</i>            | <i>Co-x</i>                  | F: ATGCACAGGGGAATGGGATG<br>R: GCCATAGCGAGTGAGAGTGCG      | F: 60.11<br>R: 63.42   | 279              | 1.06           | 0.98            |
| <i>Phvul.001G244300</i>  | <i>Co-AC</i>                 | F: GAAACGTCTCCGCAGAATAGTG<br>R: GTCTTGTTGTTTCCTTGGAGTTG  | F: 59.40<br>R: 60.44   | 150              | 0.99           | 0.99            |
| <i>Phvul.001G244400</i>  | <i>Co-AC</i>                 | F: TACAGCAAGAGAGCGGTAAAGG<br>R: CCCTTTGTCACTTTGTTTTGAAGC | F: 60.62<br>R: 59.67   | 121              | 1.07           | 0.99            |
| <i>Phvul.001G244500</i>  | <i>Co-AC</i>                 | F: CAATGCACAGCTCGCAACTC<br>R: GGAAGTGTGAAAGCTCTGCTAAC    | F: 60.45<br>R: 59.81   | 141              | 1.09           | 0.98            |
| <i>Phvul.001G245300</i>  | <i>CoPv01<sup>CDRK</sup></i> | F: TCTGCTGGAAGGGTGGTAGTC<br>R: GGACGTTATGTGAACAAGGTTTGC  | F: 61.17<br>R: 61.08   | 93               | 1.04           | 0.99            |

|                         |                              |                                                          |                      |     |      |      |
|-------------------------|------------------------------|----------------------------------------------------------|----------------------|-----|------|------|
| <i>Phvul.001G246300</i> | <i>CoPv01<sup>CDRK</sup></i> | F: CTTCTTCCCTTCACTTCGATACC<br>R: GTTGAGAGTGTGTTGTGGCAGT  | F: 58.57<br>R: 58.98 | 87  | 0.95 | 0.99 |
| <i>Phvul.003G109100</i> | <i>PR1a</i>                  | F: GTCCTAACGGAGGATCACTCA<br>R: CAGGGATTGGCCAGAAGGTAT     | F: 58.62<br>R: 59.50 | 148 | 1.01 | 0.98 |
| <i>Phvul.006G196900</i> | <i>PR1b</i>                  | F: GGTTTGCCTATGATCCCAATGC<br>R: TGTTGTGAGCGTTGAGGAAGTC   | F: 59.96<br>R: 61.06 | 115 | 0.99 | 0.99 |
| <i>Phvul.009G256400</i> | <i>PR2</i>                   | F: CAGAGGTTCTCATTTGCTGCTTTC<br>R: ATGCCATAACACACCCCGATTG | F: 60.62<br>R: 61.75 | 98  | 1.09 | 0.99 |

<sup>a</sup>Based on the *Phaseolus vulgaris* genome available on the Phytozome v1.2 platform:  
<https://phytozome.jgi.doe.gov/pz/portal.html#>; \* Reference genes;  
<sup>b</sup> Amplification efficiency obtained from the Equation  $E=[10^{(-1/\text{slope})}]-1$  (Rasmussen, 2001);  
<sup>c</sup> Coefficient of determination of linear regression.

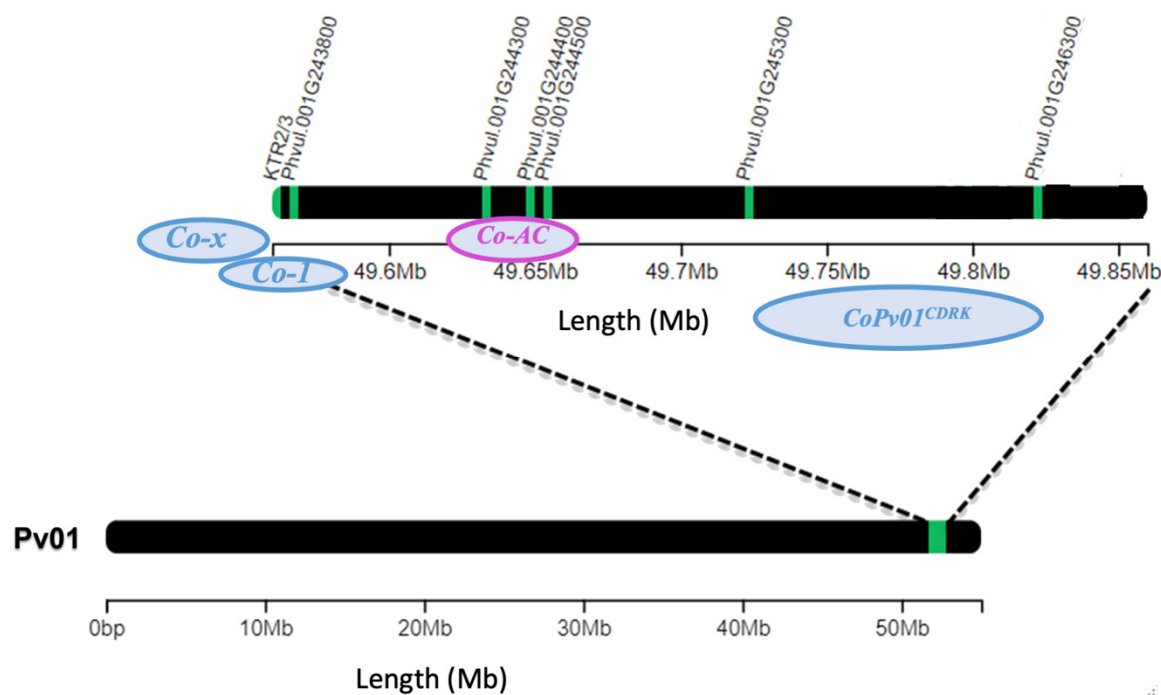

**Figure S1** Common bean chromosome Pv01 containing candidate genes for anthracnose resistance genes *Co-x* (*KTR2/3*), *Co-1* (*Phvul.001G243800*), *Co-AC* (*Phvul.001G244300*, *Phvul.001G244400*, and *Phvul.001G244500*), and *CoPv01<sup>CDRK</sup>/PhgPv01<sup>CDRK</sup>* (*Phvul.001G245300* and *Phvul.001G246300*).
